# Supplementary material
Source: PubMed Central journal article supplement (PMC3083181)

## Supplemental figure legends

**Fig. S1. Localization of the chimeric IL-2R $\alpha$  including the hydrophobic amino acid cluster of IL-2R $\beta$  to the plasma membrane.** (A) Structures of wild-type IL-2R $\alpha$  and its chimeric receptors. The signal sequence, transmembrane region, the cytoplasmic tail (residues 269-551) and hydrophobic amino acid cluster (residues 365-369) of IL-2R $\beta$  are indicated. (B) MEF cells transiently expressing wild-type IL-2R $\alpha$  and the indicated chimeric receptors were grown on coverslips and the cell surface receptors were bound by an anti-IL-2R $\alpha$  antibody (H-31) at 0°C, followed by treatment with a chemical crosslinker. The cells were cultured at 37°C for 120 minutes, fixed and incubated with an anti-LAMP1 monoclonal antibody. Fluorescence labeling was carried out for IL-2R $\alpha$  (red) and LAMP1 (green). Scale bars: 10  $\mu$ m.

**Fig. S2. Expression levels of IL-2R $\beta$  and IL-4R $\alpha$  in BAF-B03 transfectants.** (A,B) The expression levels of IL-2R $\beta$  and IL-4R $\alpha$  on the cell surface of BAF transfectants were examined by flow cytometry. BAF $\beta$ -clone 15, BAF $\beta$ -clone 21, BAF $\beta$ -mH2-clone 10, BAF $\beta$ -mH2-clone 38, BAF-IL-4R $\alpha$ -clone 18, BAF-IL-4R $\alpha$ -clone 38, BAF-IL-4R $\alpha$ -mH-clone 2 and BAF-IL-4R $\alpha$ -mH-clone 48 were incubated with an anti-IL-2R $\beta$  antibody (TU11) or anti-IL-4R $\alpha$  antibody (MAB230), followed by incubation with a FITC-conjugated secondary antibody.

**Fig. S3. Internalization and degradation of IL-2R $\beta$  and IL-4R $\alpha$  in MEF transfectants.** (A,B) Internalization of IL-2R $\beta$  and IL-4R $\alpha$  in the transfectants. MEF transfectants were incubated with <sup>125</sup>I-anti-IL-2R $\beta$  antibody (TU11) or <sup>125</sup>I- anti-IL-4R $\alpha$  antibody (MAB230) at 0°C. The cells were incubated at 37°C and harvested at the indicated times. The radioactivities of the cell surface-bound acid-removable fractions (a) and intracellular acid-unremovable fractions (b) were counted. (C,D) Degradation of IL-2R $\beta$  and IL-4R $\alpha$  in the transfectants. MEF transfectants were incubated with <sup>125</sup>I-anti-IL-2R $\beta$  antibody or <sup>125</sup>I- anti-IL-4R $\alpha$  antibody at 0°C, followed by treatment with the chemical crosslinker DTSSP. The cells were incubated at 37°C and harvested at the indicated times. The radioactivities of the culture supernatants (a), cell precipitate fractions (b) and TCA-soluble fractions of the culture supernatants (c) were counted. The values represent the means  $\pm$  SE of triplicate determinations.

**Fig. S4. Cytokine-induced tyrosine phosphorylation of IL-2R $\beta$ , IL-4R $\alpha$  and STAT proteins in BAF-B03 transfectants.** (A) BAF $\beta$ -clone 21 and BAF $\beta$ -mH2-clone 38 cells were incubated with

1nM human recombinant IL-2 for the indicated times. Total lysate: aliquots (10  $\mu$ g) of the lysates were immunoblotted with an anti-phosphotyrosine STAT5 monoclonal antibody (Y694) (top panel) or anti-STAT5 antibody (C-17) (2<sup>nd</sup> panel). Aliquots (1 mg) of the cell lysates were immunoprecipitated with an anti-IL-2R $\beta$  monoclonal antibody (TU11) and immunoblotted with an anti-phosphotyrosine monoclonal antibody (PY100) (3<sup>rd</sup> panel) or anti-IL-2R $\beta$  antibody (C20) (bottom panel). (B) BAF-IL-4R $\alpha$ -clone 38 and BAF-IL-4R $\alpha$ -mH-clone 2 cells were incubated with 1nM human recombinant IL-4 for the indicated times. Total lysate: aliquots (10  $\mu$ g) of the lysates were immunoblotted with an anti-phosphotyrosine STAT6 antibody (Y641) (top panel) or anti-STAT6 antibody (2<sup>nd</sup> panel). Aliquots (1 mg) of the cell lysates were immunoprecipitated with an anti-IL-4R $\alpha$  antibody (C20) and immunoblotted with an anti-phosphotyrosine monoclonal antibody (PY100) (3<sup>rd</sup> panel) or anti-IL-4R $\alpha$  antibody (C20) (bottom panel). IP: immunoprecipitation; IB: immunoblotting.

**Fig. S5. Endosomal sorting of IL-2R $\beta$  or IL-4R $\alpha$  along with IL-2R $\gamma$ c in MEF transfectants.**

(A,B) MEF $\beta$ , MEF $\beta$ -mH2, MEF-IL-4R $\alpha$  and MEF-IL-4R $\alpha$ -mH cells transiently expressing IL-2R $\gamma$ c were grown on coverslips and incubated with 100nM human recombinant IL-2 or 5nM human recombinant IL-4 for 6 hours. Then the cells were fixed and double-labeled with an anti-IL-2R $\beta$  antibody (TU11) or anti-IL-4R $\alpha$  antibody (MAB230) and an anti-IL-2R $\gamma$ c (TUGh4). The cells were incubated with fluorescently labeled secondary antibodies. (C) MEF $\beta$  and MEF $\beta$ -mH2 cells transiently expressing IL-2R $\gamma$ c were grown on coverslips and the cell surface receptors were incubated with an anti-IL-2R $\beta$  antibody (TU11) and anti-IL-2R $\gamma$ c (TUGh4) along with 100nM IL-2 at 0°C. After washing, The cells were cultured for 40 minutes at 37°C, fixed and incubated with an anti-mouse specific or anti-rat specific fluorescently labeled secondary antibody. Fluorescence labeling was carried out for IL-2R $\beta$  (red) and IL-2R $\gamma$ c (green). Fluorescence images were observed using a confocal laser microscope. Scale bars: 10  $\mu$ m.

**Fig. S6. IL-2R $\beta$  and IL-4R $\alpha$  sorting to transferrin receptor (TfR)-positive compartments.**

MEF $\beta$ , MEF $\beta$ -mH2, MEF-IL-4R $\alpha$  and MEF-IL-4R $\alpha$ -mH cells were grown on coverslips and the cell surface receptors were bound by an anti-IL-2R $\beta$  antibody (TU11) or anti-IL-4R $\alpha$  antibody (MAB230) at 0°C, followed by treatment with a chemical crosslinker. The cells were cultured for 40 minutes at 37°C, fixed and incubated with an anti-transferrin receptor monoclonal antibody (R17217.1.4). Fluorescence labeling was carried out for IL-2R $\beta$  (red), IL-4R $\alpha$  (red) and transferrin receptor (green). Scale bars: 10  $\mu$ m.

Figure S1

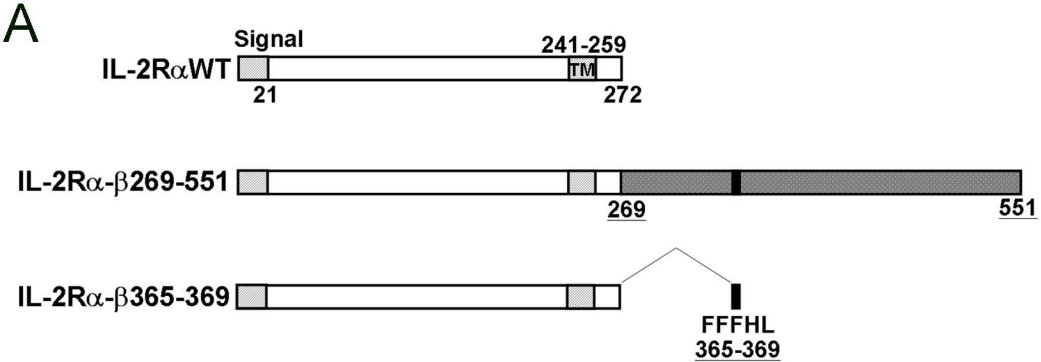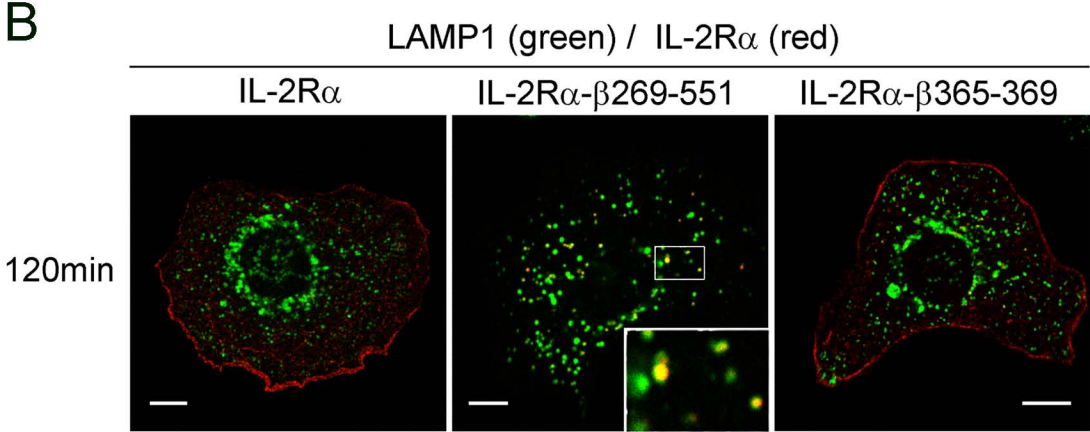

Figure S2

**A**

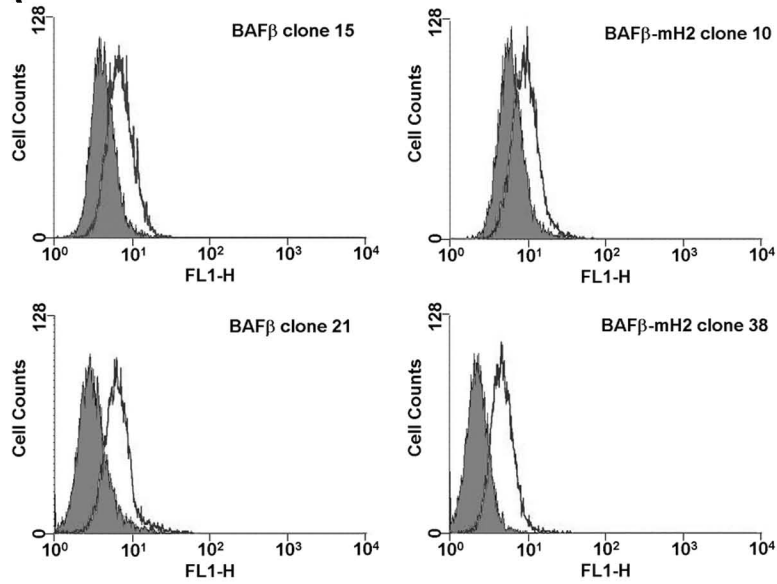

**B**

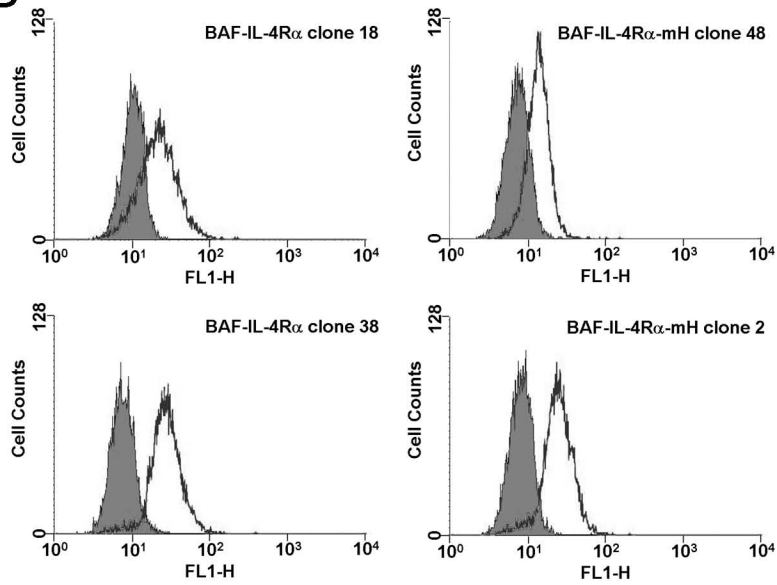

Figure S3

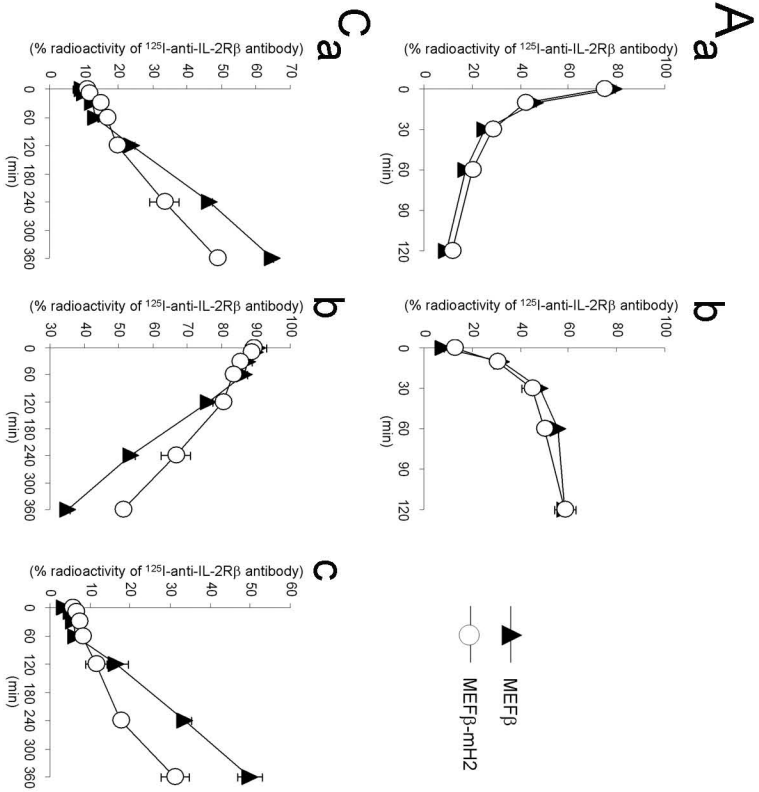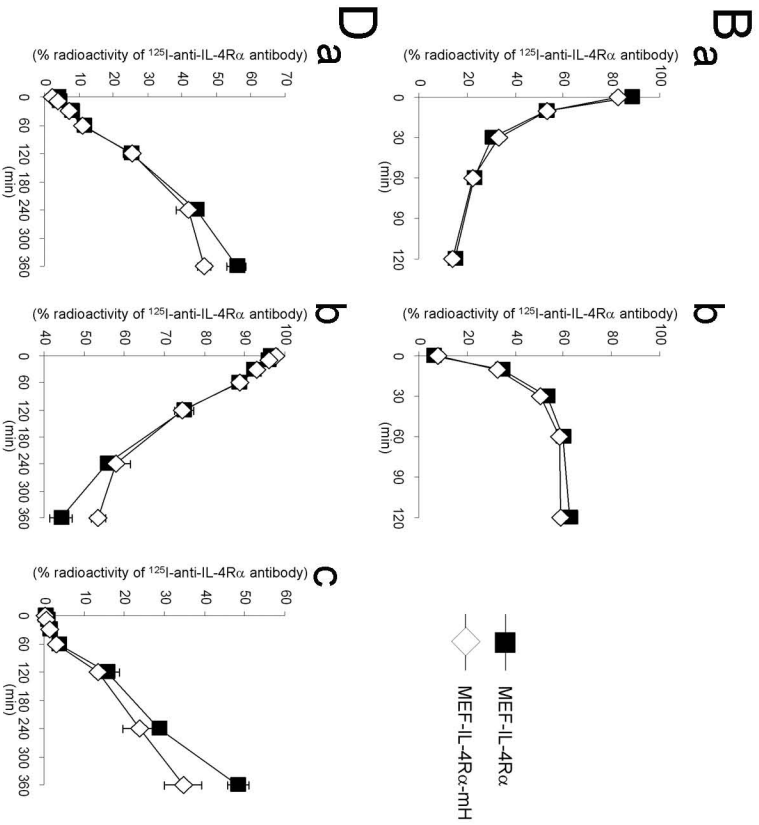

Figure S4

**A**

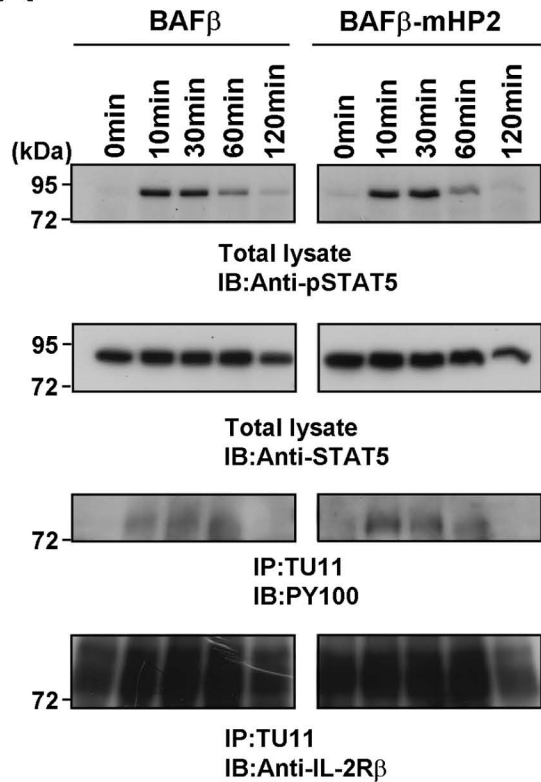

**B**

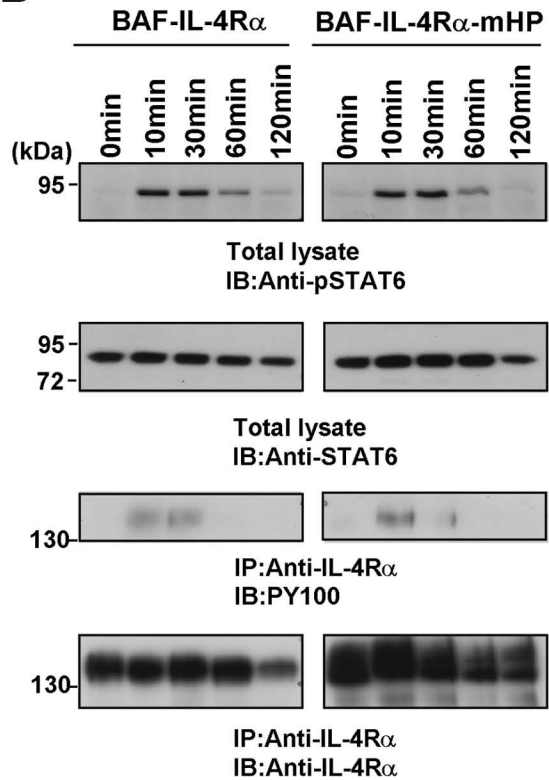

Figure S5

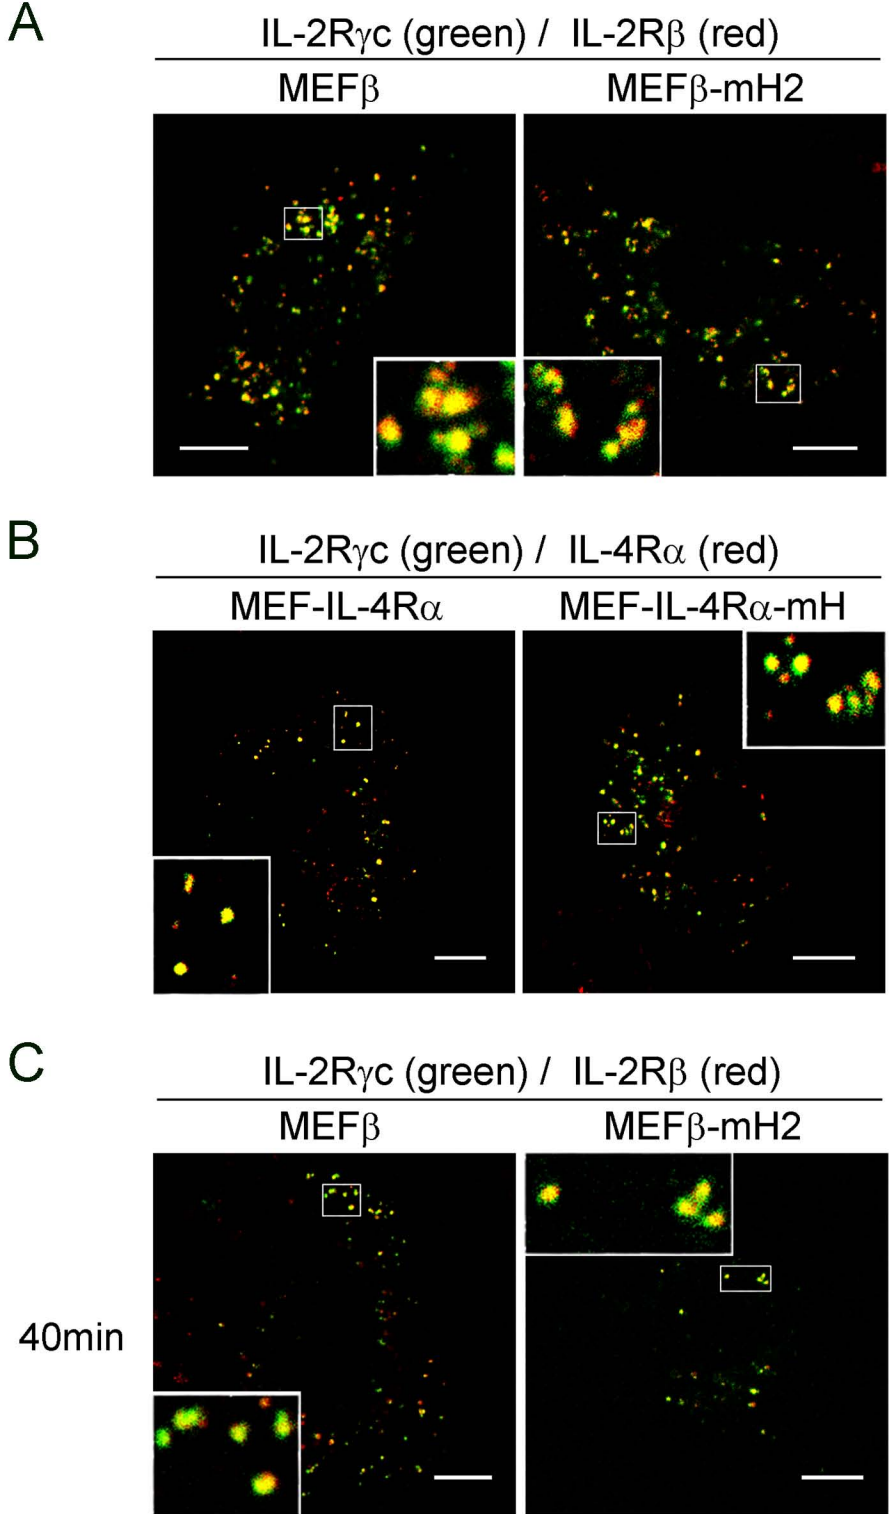

Figure S6

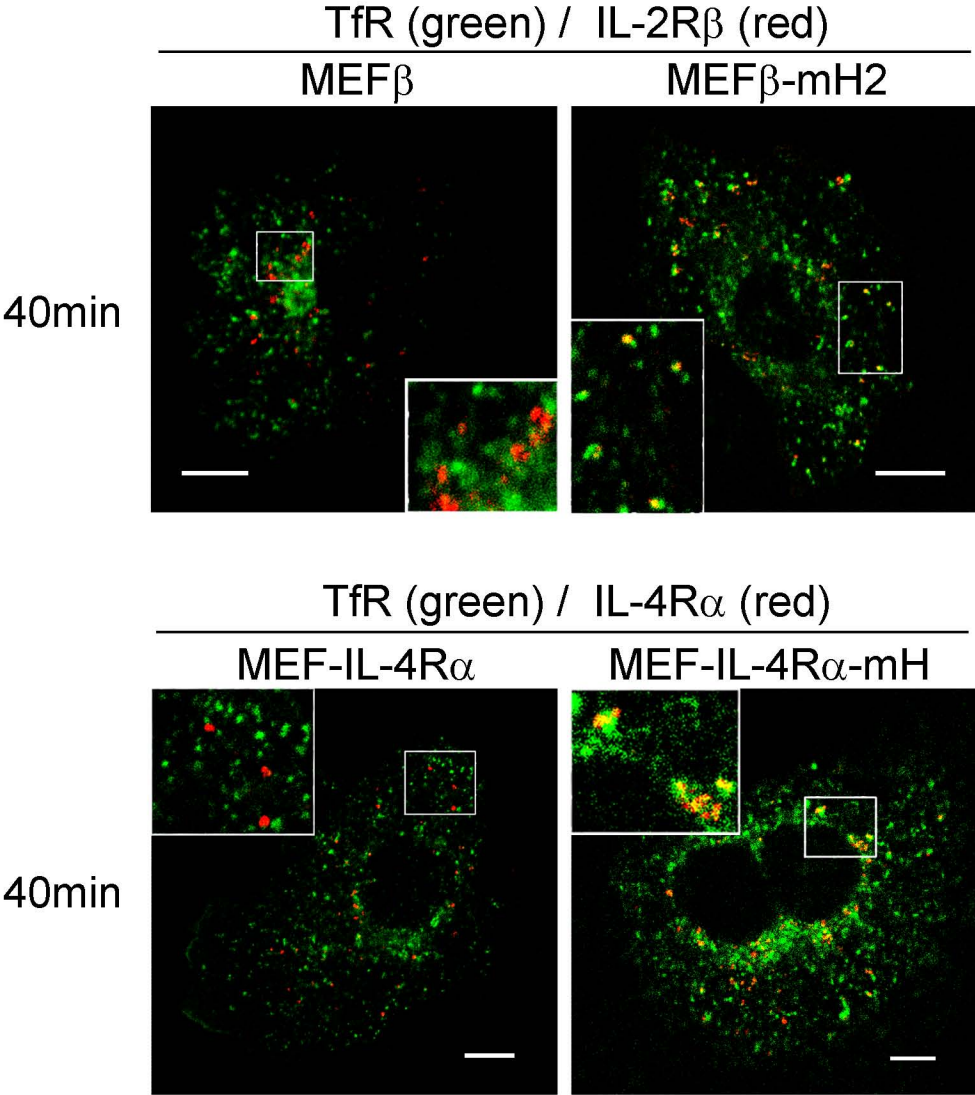

Supplement: supp_M110.191924_jbc.M110.191924-1.pdf [file supp_M110.191924_jbc.M110.191924-1.pdf]
